# Supplementary material
Source: ML conference proceedings conference paper supplement (https://proceedings.neurips.cc/paper_files/paper/2019/hash/2172fde49301047270b2897085e4319d-Abstract.html)
Supplement: Supplementary file [file 2172fde49301047270b2897085e4319d-Supplemental.zip]

---

# Supplement for “Causal Regularization”

---

**Dominik Janzing**  
Amazon Research Tübingen  
Germany  
janzind@amazon.com

## 0.1 Proof of equation (8)

Due to  $\Sigma_{\mathbf{X}\mathbf{X}} = \mathbf{X}^T \mathbf{X}$  we have

$$\Sigma_{\mathbf{X}\mathbf{X}} X^{-1} = X^\dagger X X^{-1} = X^\dagger,$$

since  $XX^{-1}$  is the orthogonal projection onto the image of  $X$ , which is orthogonal to the kernel of  $X^T$ . Then invertibility of  $\Sigma_{\mathbf{X}\mathbf{X}}$  implies

$$X^{-1}E = \Sigma_{\mathbf{X}\mathbf{X}}^{-1} X^T E = \Sigma_{\mathbf{X}\mathbf{X}}^{-1} \Sigma_{\mathbf{X}E}.$$

## 1 Rewriting Ridge and Lasso in terms of empirical covariance matrices

We first write  $\hat{Y} = \hat{Y}_{\hat{\mathbf{X}}} + \hat{Y}_\perp$  where  $\hat{Y}_{\hat{\mathbf{X}}}$  and  $\hat{Y}_\perp$  denote the projections of  $\hat{Y}$  onto the image of  $\hat{\mathbf{X}}$  and its orthogonal complement, respectively. Then we can rewrite the empirical error as

$$\|\hat{Y} - \hat{\mathbf{X}}\mathbf{a}'\|^2 = \|\hat{Y}_{\hat{\mathbf{X}}} - \hat{\mathbf{X}}\mathbf{a}'\|^2 + \|\hat{Y}_\perp\|^2 = (\mathbf{a}' - \widehat{\Sigma_{\mathbf{X}\mathbf{X}}}^{-1} \widehat{\Sigma_{\mathbf{X}Y}})^T \widehat{\Sigma_{\mathbf{X}\mathbf{X}}} (\mathbf{a}' - \widehat{\Sigma_{\mathbf{X}\mathbf{X}}}^{-1} \widehat{\Sigma_{\mathbf{X}Y}}) + \|\hat{Y}_\perp\|^2.$$

The second term does not depend on  $\mathbf{a}'$  and is thus irrelevant for the optimization.

## 2 On the difficulty of mixing scenarios 1 and 2

Let us consider finite sample issues for scenario 2 in the purely confounded regime  $\mathbf{a} = 0$ . Then,  $Y = \mathbf{Z}\mathbf{c}$  and the empirical correlations between  $\mathbf{X}$  and  $Y$  read

$$\widehat{\Sigma_{\mathbf{X}Y}} = \widehat{\Sigma_{\mathbf{X}\mathbf{Z}}} \mathbf{c} = M^T \widehat{\Sigma_{\mathbf{Z}\mathbf{Z}}} \mathbf{c}. \quad (1)$$

Assuming that  $\mathbf{c}$  is distributed according to an isotropic Gaussian  $\mathcal{N}(0, \sigma_c^2 \mathbf{I})$  for some parameter  $\sigma_c$  (to resemble the distribution of  $\hat{E}$  in scenario 1), the random vector (1) follows the distribution

$$\mathcal{N}(0, \sigma_c^2 M^T \widehat{\Sigma_{\mathbf{Z}\mathbf{Z}}}^2 M), \quad (2)$$

if  $\widehat{\Sigma_{\mathbf{Z}\mathbf{Z}}}$  and  $M$  are fixed. In the finite sample regime,  $\sigma_c^2 M^T \widehat{\Sigma_{\mathbf{Z}\mathbf{Z}}}^2 M$  is not a multiple of  $\widehat{\Sigma_{\mathbf{X}\mathbf{X}}} = M^T \widehat{\Sigma_{\mathbf{Z}\mathbf{Z}}} M$ , because  $\widehat{\Sigma_{\mathbf{Z}\mathbf{Z}}}$  is the identity only in the population limit. Hence, there is no simple relation between the distribution of  $\widehat{\Sigma_{\mathbf{X}Y}}$  and the matrix  $\widehat{\Sigma_{\mathbf{X}\mathbf{X}}}$ , which has been crucial for our analysis of scenarios 1 and 2. For high dimensions  $d$  and  $\ell$  and random matrices  $M$ , one could possibly derive statements on the asymptotic relation between  $M^T \widehat{\Sigma_{\mathbf{Z}\mathbf{Z}}}^2 M$  and  $M^T \widehat{\Sigma_{\mathbf{Z}\mathbf{Z}}} M$  regarding spectra and spectral subspaces using free probability theory [1, 2].

## 3 Proof of Lemma 1

By definition, The difference between the two losses can be written as:

$$\begin{aligned} \int (y - f(\mathbf{x}))^2 [p(y|\mathbf{x}) - p(y|do(\mathbf{x}))] p(\mathbf{x}) d\mathbf{x} &= \int (y - f(\mathbf{x}))^2 p(y|\mathbf{x}, \mathbf{z}) \{p(\mathbf{x}, \mathbf{z}) - p(\mathbf{x})p(\mathbf{z})\} d\mathbf{z} d\mathbf{x} \\ &= \mathbf{E}[(Y - f(\mathbf{X}))^2 | \mathbf{x}, \mathbf{z}] \{p(\mathbf{x}, \mathbf{z}) - p(\mathbf{x})p(\mathbf{z})\} d\mathbf{z} d\mathbf{x}. \end{aligned}$$

We rewrite the conditional expectation as

$$\begin{aligned}\mathbf{E}[(Y - f(\mathbf{X}))^2 | \mathbf{x}, \mathbf{z}] &= \mathbf{E}[(Y' + \mathbf{z}\mathbf{c} - f(\mathbf{x}))^2 | \mathbf{x}, \mathbf{z}] \\ &= \mathbf{E}[Y'^2 | \mathbf{x}, \mathbf{z}] + (\mathbf{z}\mathbf{c})^2 + f(\mathbf{x})^2 + \mathbf{E}[Y' | \mathbf{x}, \mathbf{z}]\mathbf{z}\mathbf{c} - \mathbf{E}[Y' | \mathbf{x}, \mathbf{z}]f(\mathbf{x}) - f(\mathbf{x})\mathbf{z}\mathbf{c}. \\ &= \mathbf{E}[Y'^2 | \mathbf{x}] + (\mathbf{z}\mathbf{c})^2 + f(\mathbf{x})^2 + g(\mathbf{x})\mathbf{z}\mathbf{c} - g(\mathbf{x})f(\mathbf{x}) - f(\mathbf{x})\mathbf{z}\mathbf{c},\end{aligned}$$

where the last step used  $Y' \perp\!\!\!\perp \mathbf{Z} | \mathbf{X}$  which follows from d-separation in the DAG in Figure 4. Since the above conditional expectation is integrated over  $p(\mathbf{x}, \mathbf{z}) - p(\mathbf{x})p(\mathbf{z})$ , only terms matter that contain both  $\mathbf{x}$  and  $\mathbf{z}$ . We therefore obtain

$$\begin{aligned}\mathbf{E}[(Y - f(\mathbf{X}))^2] - \mathbf{E}_{do(\mathbf{X})}[(Y - f(\mathbf{X}))^2] &= \int (g(\mathbf{x}) - f(\mathbf{x}))\mathbf{z}\mathbf{c}\{p(\mathbf{x}, \mathbf{z}) - p(\mathbf{x})p(\mathbf{z})\}d\mathbf{z}d\mathbf{x} \\ &= (\Sigma_{(g-f)(\mathbf{X}), \mathbf{Z}})\mathbf{c}.\end{aligned}$$

## 4 Proof of Theorem 2

We first need the following result which is basically Lemma 2.2 in [3] together with the remarks preceding 2.2:

**Lemma** [Johnson-Linderstrauss type result] *Let  $P$  be the orthogonal projection onto an  $n$ -dimensional subspace of  $\mathbb{R}^m$  and  $v \in \mathbb{R}^m$  be randomly drawn from the uniform distribution on the unit sphere. Then  $\|Pv\|^2 \geq \beta n/m$  with probability at most  $e^{n(1-\beta+\ln \beta)/2}$ .*

We are now able to prove Theorem 2. Let  $\mathbf{c}^{\mathcal{F}}$  be the orthogonal projection of  $\mathbf{c}$  onto the span of  $\{\Sigma_{(g-f)(\mathbf{X})\mathbf{Z}} | f \in \mathcal{F}\}$  (whose dimension is at most  $d_{\text{corr}} + 1$ ). Note that the vector  $\Sigma_{(g-f)(\mathbf{X})\mathbf{Z}} \in \mathbb{R}^\ell$  has the components  $\langle (g-f)(\mathbf{X}), Z_j \rangle$  if  $Z_j$  denotes the components of  $\mathbf{Z}$ , which are orthonormal in  $\mathcal{H}$ . Hence

$$\|\Sigma_{(g-f)(\mathbf{X})\mathbf{Z}}\| \leq b.$$

Thus the absolute value of the difference of the losses is bounded by

$$|\Sigma_{(g-f)(\mathbf{X})\mathbf{Z}}\mathbf{c}^{\mathcal{F}}| \leq b\sqrt{V}\|\mathbf{c}^{\mathcal{F}}\|.$$

Then the proof follows from

$$\|\mathbf{c}^{\mathcal{F}}\| \leq \sqrt{\beta \frac{d_{\text{corr}} + 1}{\ell}},$$

due to the above Lemma.

## References

- [1] D. Voiculescu, editor. *Free probability theory*, volume 12 of *Fields Institute Communications*. American Mathematical Society, 1997.
- [2] J. Mingo and R. Speicher. *Free probability and random matrices*. Springer, New York, 2017.
- [3] S. Dasgupta and A. Gupta. An elementary proof of a theorem of Johnson and Lindenstrauss. *Structures and Algorithms*, 22(1):60–65, 2003.
